# Supplementary material for: Crystal Structures of Fusion Cores from CCoV-HuPn-2018 and SADS-CoV
Source: MDPI journal article supplement (doi:10.3390/v16020272), 2024-02-09
Supplement: s1 [file s1]

## Supplementary Materials:

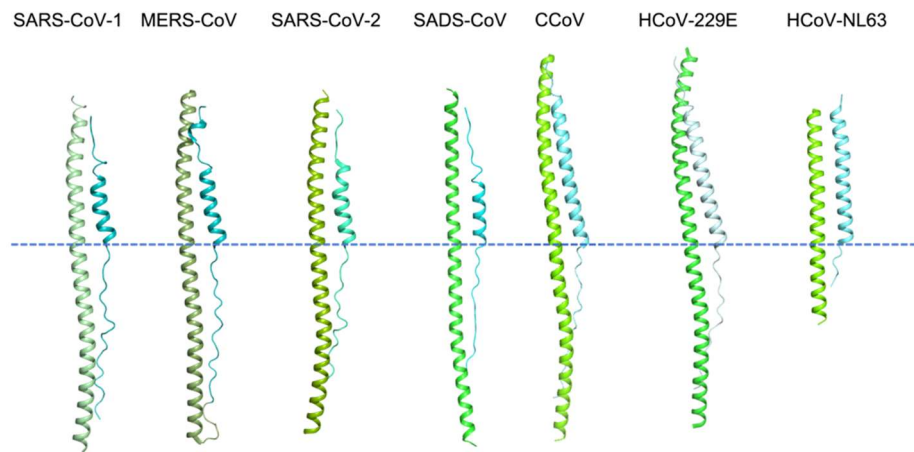

**Figure S1.** HR2 monomers from representative coronaviruses. SARS-CoV-1 (PDB entry: 2BEZ), MERS-CoV (PDB entry: 4NJL), SARS-CoV-2 (PDB entry: 6LXT), HCoV-229E (PDB entry: 5YL9), HCoV-NL63 (PDB entry: 2IEQ) and two our structures.

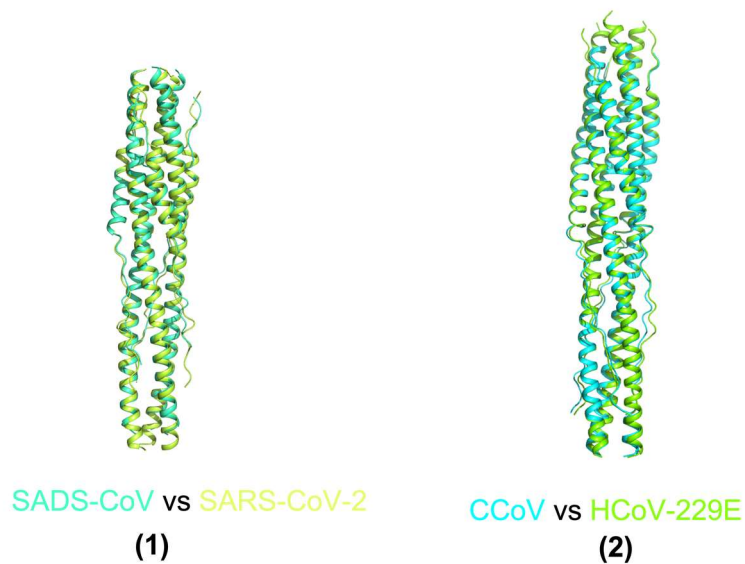

**Figure S2.** (lemon) Fusion cores (1) and CCoV-HuPn-2018 (cyan) and HCoV-229E (chartreuse) fusion cores (2), using SARS-CoV-2 (PDB entry: 6LXT) and HCoV-229E (PDB entry: 5YL9) as reference, respectively.

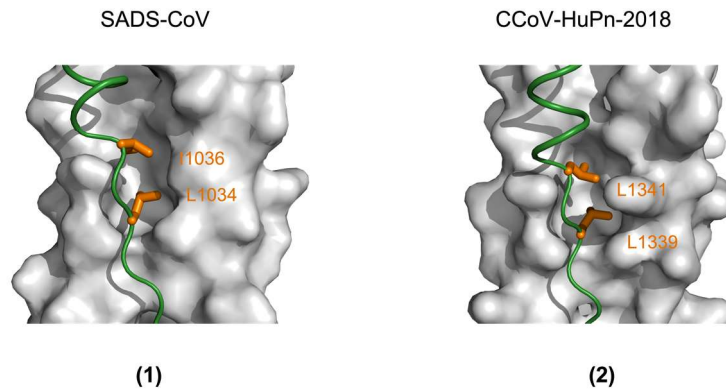

**Figure S3.** Trimer with residues L1034 and I1036 (SADS-CoV) (1) or L1339 and L1341 (CCoV-HuPn-2018) (2) from HR2 pointing toward it.

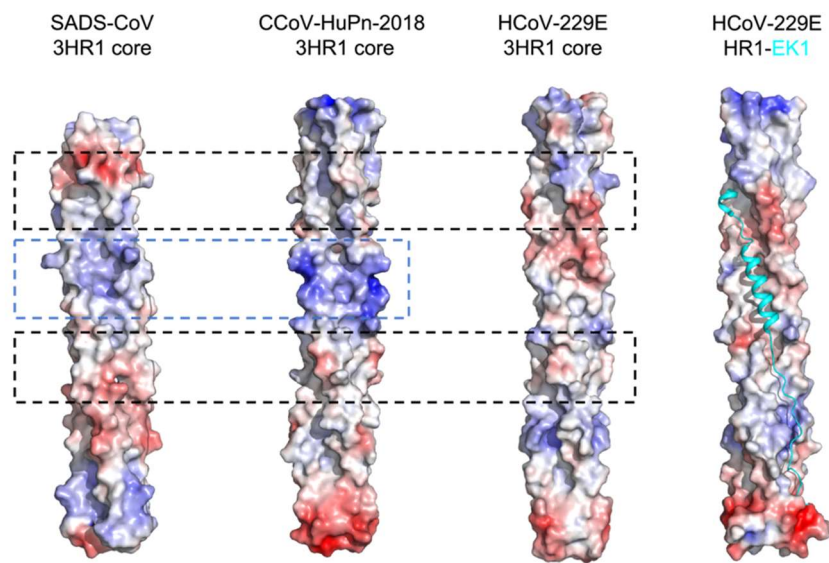

**Figure S4.** HR1 core from SADS-CoV, CCoV-HuPn-2018 and HCoV-229E. The black dashed boxes depict the regions on different 3HR1 cores where the electrostatic surface potentials are similar among three  $\alpha$ -HCoVs, while the blue dashed boxes depict the regions on 3HR1 cores where the electrostatic surface potentials are similar in two  $\alpha$ -HCoVs. Structure of HR1-EK1 6-HB is shown on the right panel as electrostatic surface (3HR1) and ribbon (EK1, cyan).
